# Supplementary material
Source: publisher figshare collection journal article supplement (https://sage.figshare.com/ndownloader/files/22897064)
Supplement: Supplementary file 1 [file 22897064]

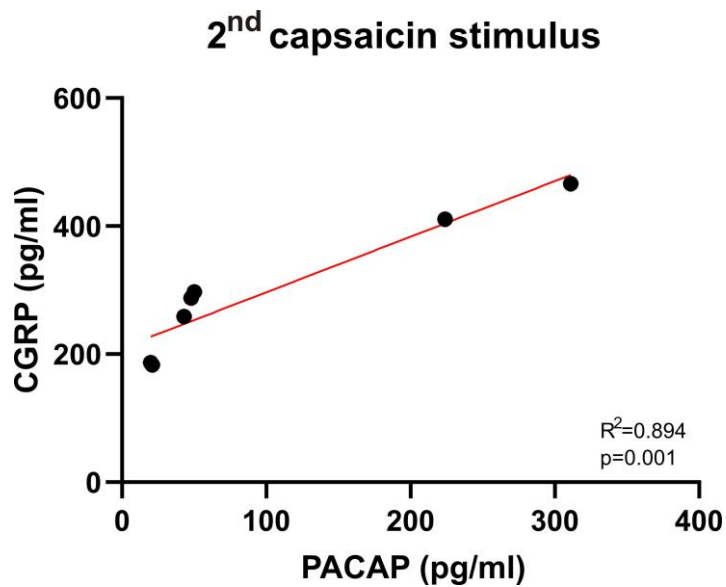

**Supplemental Figure 1. Correlation of *in situ* PACAP and CGRP release from the trigeminal ganglion samples.** Correlations of the stimulated (1  $\mu$ M Capsaicin) release of PACAP and CGRP from the same TG samples. Significant correlation was observed for the TG data. Data are shown as individual data points with p values and  $R^2$  obtained from the correlation analysis.

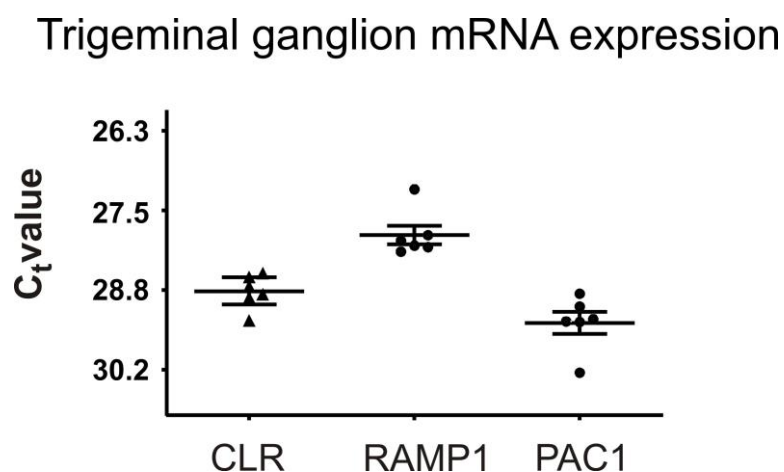

**Supplemental Figure 2. mRNA expression in the trigeminal ganglion.**

Expression of mRNA for the CGRP receptor components CLR and RAMP1 combine with the expression for the PACAP receptor (PAC<sub>1</sub>) from current work. Data are shown as Ct values) with median and interquartile range (n = 6).
